# Supplementary material for: Discovery and characterization of a novel family of prokaryotic nanocompartments involved in sulfur metabolism
Source: eLife. 2021 Apr 6;10:e59288. doi: 10.7554/eLife.59288 (PMC8049743; doi:10.7554/eLife.59288)
Supplement: Supplementary file 1. — Number of total Family 1 and Family 2 homologs compiled using NCBI BLASTp (E-value <0.01). Accession IDs WP_004080898.1 (T. maritima encapsulin shell) and WP_011055154.1 (S. elongatus PCC 7942) encapsulin shell genes were used as Family 1 and Family 2 queries, respectively. Results based on NCBI’s Genome Information resource (February 2020). [file elife-59288-supp1.xlsx]

## Sheet: Sheet1
Supplementary File 1: Total counts of Family 1 and Family 2 encapsulins found in prokaryotic genomes
Encapsulin Family	Count
Family 1	3023
Family 2	5540
