# Supplementary material for: Discovery and characterization of a novel family of prokaryotic nanocompartments involved in sulfur metabolism
Source: eLife. 2021 Apr 6;10:e59288. doi: 10.7554/eLife.59288 (PMC8049743; doi:10.7554/eLife.59288)
Supplement: Supplementary file 2. — Co-occurrence and median gene distance of genes found to neighbor Family 2a shell genes using the EFI-GNT web tool. Open reading frames neighboring Family 2a shell genes in the European Nucleic Acid (ENA) database are grouped by shared pfam values. [file elife-59288-supp2.xlsx]

## Sheet: Sheet1
Supplementary File 2: Genome neighborhood analysis of Family 2a shell genes
Family 2a gene co-occurrence
Shared name	Description	pfam	Co-occurrence	Median gene distance	% Occurrence
aminotran_5	Amino transferase class-V	PF00266	1208 / 1273	1	94.9
Hexapep	Bacterial transferase hexapeptide	PF00132	715 / 1273	2	56.2
Rhodanese	Rhodanese-like domain	PF00581	620 / 1273	3	48.7
BPD_transp_1	Binding-protein-dep	PF00528	483 / 1273	7	37.9
abc tran	ABC transporter	PF00005	379 / 1273	6	29.8
HTH_1-LysR	Bacterial regulatory helix turn helix	PF00126-PF03466	338 / 1273	4	26.6
Hexapep-SATase	Bacterial transferase hexapeptide	PF00132-PF06426	297 / 1273	1	23.3
HTH_3	Helix turn-helix	PF01381	287 / 1273	1	22.5
PALP	Pyridoxal-phosphate dependent enzyme	PF00291	287 / 1273	2	22.5
N/A	N/A	No assigned PFAM	1058 / 1273	6	82.5
