# Supplementary material for: Discovery and characterization of a novel family of prokaryotic nanocompartments involved in sulfur metabolism
Source: eLife. 2021 Apr 6;10:e59288. doi: 10.7554/eLife.59288 (PMC8049743; doi:10.7554/eLife.59288)
Supplement: Supplementary file 3. — Co-occurrence and median gene distance of genes found to neighbor Family 2b shell genes using the EFI-GNT web tool. Open reading frames neighboring Family 2b shell genes in the European Nucleic Acid (ENA) database are grouped by shared pfam values. [file elife-59288-supp3.xlsx]

## Sheet: Sheet1
Supplementary File 3: Genome neighborhood analysis of Family 2b shell genes.
Family 2b gene co-occurence table
Shared name	Description	pfam	Co-occurrence	Median gene distance	% Occurrence
acetyltransf_1	Acetyltransferase (GNAT) family	PF00583	463 / 2130	2	21.7
cNMP_binding	cyclic nucleotide-binding domain	PF00027	768 / 2130	1	36.1
Amindase_2	N-acetylmuramoyl-L-alamine amidase	PF01510	440 / 2130	1	20.7
polyprenyl_synt	Polyprenyl synthase	PF00348	869 / 2130	1	40.8
PALP	Pyridoxal-phosphate dependent enzyme	PF00291	568 / 2130	3	26.7
sigma70 r3-Sigma70	Sigma-70 region 3	PF04539-PF04542-PF04545	503 / 2130	6	23.7
Na_H_Exchanger	Sodium/ hydrogen exchanger	PF00999	463 / 2130	3	21.7
az-UBP	Zn-finger in ubiquitin-hydrolases	PF02148	434 / 2130	4	20.4
N/A	N/A	No assigned PFAM	2088 / 2130	5	98
