# Supplementary material for: Discovery and characterization of a novel family of prokaryotic nanocompartments involved in sulfur metabolism
Source: eLife. 2021 Apr 6;10:e59288. doi: 10.7554/eLife.59288 (PMC8049743; doi:10.7554/eLife.59288)
Supplement: Supplementary file 4. — NCBI BLASTp results of Family 2a shell homologs found in cyanobacteria. Results based on NCBI’s Genome Information resource (February 2020). Environment annotations based on the Joint Genome Institute (JGI) Integrated Microbial Genomes and Microbiomes (IMG/M) database and (Shih et al., 2013). [file elife-59288-supp4.xlsx]

## Sheet: Supplementary File 4
Supplementary File 4: Family 2a shell genes are found in freshwater and brackish water cyanobacteria, but not marine cyanobacteria.
NCBI Accession ID	Species	Evironment
AJD58949.1	Synechococcus sp. UTEX2973	Freshwater
WP_011055154.1	Synechococcus sp.	Freshwater
QFZ92646.1	Synechococcus elongatus PCC11802	Freshwater
AZB72703.1	Synechococcus elongatus PCC11801	Freshwater
WP_015125275.1	Synechococcus sp.PCC6312	Freshwater
WP_002735851.1	Microcystis aeruginosa	Freshwater
TRU86312.1	Microcystis novacekii Mn_MB_F_20050700_S1	Freshwater
TRV47998.1	Microcystis panniformis Mp_GB_SS_20050300_S99	Freshwater
WP_104397895.1	Microcystis aeruginosa	Freshwater
GBE76399.1	Microcystis aeruginosaNIES-87	Freshwater
WP_061431234.1	Microcystis aeruginosa	Freshwater
REJ53903.1	Microcystis aeruginosaDA14	Freshwater
WP_002750434.1	Microcystis sp.	Freshwater
NCQ89664.1	Microcystis aeruginosaLG13-13	Freshwater
WP_002786081.1	Microcystis aeruginosa	Freshwater
WP_014276787.1	Arthrospira platensis	Freshwater
WP_006670576.1	Limnospira	Freshwater
WP_152088332.1	Arthrospira platensis	Freshwater
WP_006619903.1	Arthrospira platensis	Freshwater
WP_054465623.1	Planktothricoides sp.SR001	Freshwater
WP_006625603.1	Arthrospira platensis	Freshwater
WP_130756769.1	Microcystis aeruginosa	Freshwater
KEF42600.1	Cyanobium sp.CACIAM14	Freshwater
WP_106222825.1	Aphanothece minutissima	Freshwater
WP_015108669.1	Cyanobium sp.	Freshwater
WP_094554187.1	Synechococcus sp.1G10	Freshwater
WP_048016926.1	Synechococcus sp.GFB01	Freshwater
GAL91719.1	Microcystis aeruginosaNIES-44	Freshwater
WP_008180793.1	Moorea producens	Brackish water
WP_071103433.1	Moorea producens	Brackish water
WP_070391731.1	Moorea producens	Brackish water
WP_075897528.1	Moorea bouillonii	Brackish water
WP_008180789.1	Moorea producens	Brackish water
WP_071103431.1	Moorea producens	Brackish water
