# Supplementary material for: Discovery and characterization of a novel family of prokaryotic nanocompartments involved in sulfur metabolism
Source: eLife. 2021 Apr 6;10:e59288. doi: 10.7554/eLife.59288 (PMC8049743; doi:10.7554/eLife.59288)
Supplement: Supplementary file 5. [file elife-59288-supp5.xlsx]

## Sheet: Sheet1
Supplementary File 5: Total spectrum count of all identified proteins from liquid chromatography-mass spectrometry of excised high molecular weight bands from Figure 2B.
Protein name, Species	Uniprot ID	Plus Sulfate (Total Spectrum Count)	24 hr Sulfate Starve (Total Spectrum Count)	48 hr Sulfate Starve (Total Spectrum Count)
Protein SrpI, Synechococcus elongatus (strain PCC 7942)	sp|Q55032|SRPI_SYNE7	14	30	98
Keratin, type II cytoskeletal 1, Homo sapiens	sp|P04264|K2C1_HUMAN	12	15	86
Keratin, type I cytoskeletal 9, Homo sapiens	sp|P35527|K1C9_HUMAN	6	9	68
Keratin, type II cytoskeletal 2 epidermal, Homo sapiens	sp|P35908|K22E_HUMAN	6	8	47
Cysteine desulfurase, Synechococcus elongatus (strain PCC 7942)	tr|Q8KUU5|Q8KUU5_SYNE7	1	7	42
Keratin, type I cytoskeletal, Homo sapiens	sp|P13645|K1C10_HUMAN	7	17	41
Trypsin, Sus scrofa	sp|P00761|TRYP_PIG	25	48	36
Probable porin, Synechococcus elongatus (strain PCC 7942)	tr|Q31N75|Q31N75_SYNE7	8	19	28
Phycobilisome core-membrane linker polypeptide, Synechococcus elongatus (strain PCC 7942)	tr|Q31RF9|Q31RF9_SYNE7	9	22	21
Probable porin major outer membrane protein, Synechococcus elongatus (strain PCC 7942)	tr|Q31MQ4|Q31MQ4_SYNE7	7	10	11
Uncharacterized protein Synpcc7942_1397, Synechococcus elongatus (strain PCC 7942)	tr|Q31NE2|Q31NE2_SYNE7	2	12	7
Uncharacterized protein Synpcc7942_0391, Synechococcus elongatus (strain PCC 7942)	tr|Q31R96|Q31R96_SYNE7	0	5	2
Probable porin major outer membrane protein, Synechococcus elongatus (strain PCC 7942)	tr|Q9KHA8|Q9KHA8_SYNE7	2	5	2
