# Supplementary material for: Discovery and characterization of a novel family of prokaryotic nanocompartments involved in sulfur metabolism
Source: eLife. 2021 Apr 6;10:e59288. doi: 10.7554/eLife.59288 (PMC8049743; doi:10.7554/eLife.59288)
Supplement: Supplementary file 6. [file elife-59288-supp6.xlsx]

## Sheet: Sheet1
Supplementary File 6 | Data collection, 3D reconstruction, and refinement statistics.
Dataset	Holo-SrpI	Apo-SrpI	SrpI-sfGFP	Holo-SrpI	Apo-SrpI
				(neg stain)	(neg stain)
Microscope	Titan Krios	Talos Arctica	Talos Arctica	Tecnai F20	Tecnai F20
Stage type	Autoloader	Autoloader	Autoloader	Side entry	Side entry
Voltage (kV)	300	200	200	120	120
Detector	Gatan K2	Gatan K3	Gatan K3	Gatan UltraScan	Gatan UltraScan
Data Collection Software	SerialEM	SerialEM	SerialEM	Leginon	Leginon
Acquisition mode	Super-resolution	Super-resolution	Super-resolution	CCD	CCD
Physical pixel size (Å)	0.575	0.569	0.569	1.37	1.37
Defocus range (μm)	1.0-2.5	1.0-2.5	1.0-2.5	0.4-1.5	0.4-1.5
Electron exposure (e-/A2)	35	40	40	50	50
Data Deposition	EMPIAR-10506	EMPIAR-10510
Reconstruction	EMD-22094	EMD-22095
Session	1930-01-19	2022-09-19	2009-04-19	2009-07-19	2009-07-19
Software	RELION 3.1	RELION 3.1	RELION 3.1	RELION 3.1	RELION 3.1
Particles picked	15686	57341	60913	5901	4807
Particles final	11980	34425	36618	5901	4807
Extraction box size (pixels)	512x512x512	360x360x360	360x360x360	256x256x256	256x256x256
Final pixel size (Å)	0.8625	1.14	1.14	5.48	5.48
Accuracy rotations (°)	0.24	0.36	0.34	1.1	1.3
Accuracy translations (Å)	0.29	0.4	0.4	1.35	1.5
Map resolution (Å)	2.2	2.9	3.3	~18	~18
Map sharpening B-factor (Å2)	-35	-100	-70	NA	NA
Coordinate refinement
Software	PHENIX	PHENIX
Refinement algorithm	REAL SPACE	REAL SPACE
Resolution cutoff (Å)	2.2	2.9
FSCmodel-vs-map=0.5 (Å)	2.3	3.1
Model	PDB-6X8M	PDB-6X8T
Number of residues	280	280
B-factor overall	20	18
R.m.s. deviations
Bond lengths (Å)	0.004	0.007
Bond angles (°)	0.598	0.663
Validation
Molprobity clashscore	4.1	2.68
Rotamer outliers (%)	0.8	0.4
Cβ deviations (%)	0	0
Ramachandran plot
Favored (%)	96.7	94.6
Allowed (%)	3.3	5.4
Outliers (%)	0	0
